# Supplementary material
Source: PubMed Central journal article supplement (PMC2659275)
Supplement: en.2008-1102_1.pdf [file en.2008-1102_1.pdf]

## RETRACTION

The authors of “Hexosamine Biosynthesis Pathway Flux Contributes to Insulin Resistance via Altering Membrane Phosphatidylinositol 4,5-Bisphosphate and Cortical Filamentous Actin”, Padma Bhonagiri, Guruprasad R. Pattar, Emily M. Horvath, Kirk M. Habegger, Alicia M. McCarthy, and Jeffrey S. Elmendorf (*Endocrinology* 150:1636-1645, 2009), are retracting this manuscript because one of the authors, Emily M. Horvath, admitted to altering data in one of the figures. Specifically in Figure 2C, some of the values were incorrectly reported for the radioactive glucose uptake assay. None of the other authors associated with this publication were aware of the data manipulation. We sincerely regret if this has caused problems with investigators that have used this information experimentally.

Posted online 26 April 2010
